# Supplementary material for: Differential gene expression induced by Verteporfin in endometrial cancer cells
Source: PubMed Central journal article supplement (PMC6405995; doi:10.1038/s41598-019-40495-9), 2019-03-07
Supplement: 41598_2019_40495_MOESM1_ESM.pdf [file 41598_2019_40495_MOESM1_ESM.pdf]

**Differential gene expression induced by Verteporfin  
in endometrial cancer cells**

Gahyun Bang<sup>1#</sup>, Venkata Ramesh Dasari<sup>2#</sup>, Dokyoon Kim<sup>1, 3</sup>, and Radhika P Gogoi<sup>2,4\*</sup>

*<sup>1</sup>Biomedical and Translational Informatics Institute, Geisinger, Danville, PA, USA, <sup>2</sup>Weis Center for Research, Geisinger Clinic, Danville, PA, USA, <sup>3</sup>Huck Institute of the Life Sciences, Pennsylvania State University, University Park, PA, USA, <sup>4</sup>Geisinger Medical Center, Danville, PA, USA*

# Equal contribution.

\*Corresponding author:

Radhika Gogoi, MD, PhD  
Abigail Clinical Investigator  
Weis Center for Research  
Geisinger Clinic  
100 North Academy Avenue  
Danville, PA 17822, USA  
Email: [rpgogoi@geisinger.edu](mailto:rpgogoi@geisinger.edu)  
Phone: 570-214-9016  
Fax: 570-214-3074

**Supplementary Data**

Supplementary Figure S1

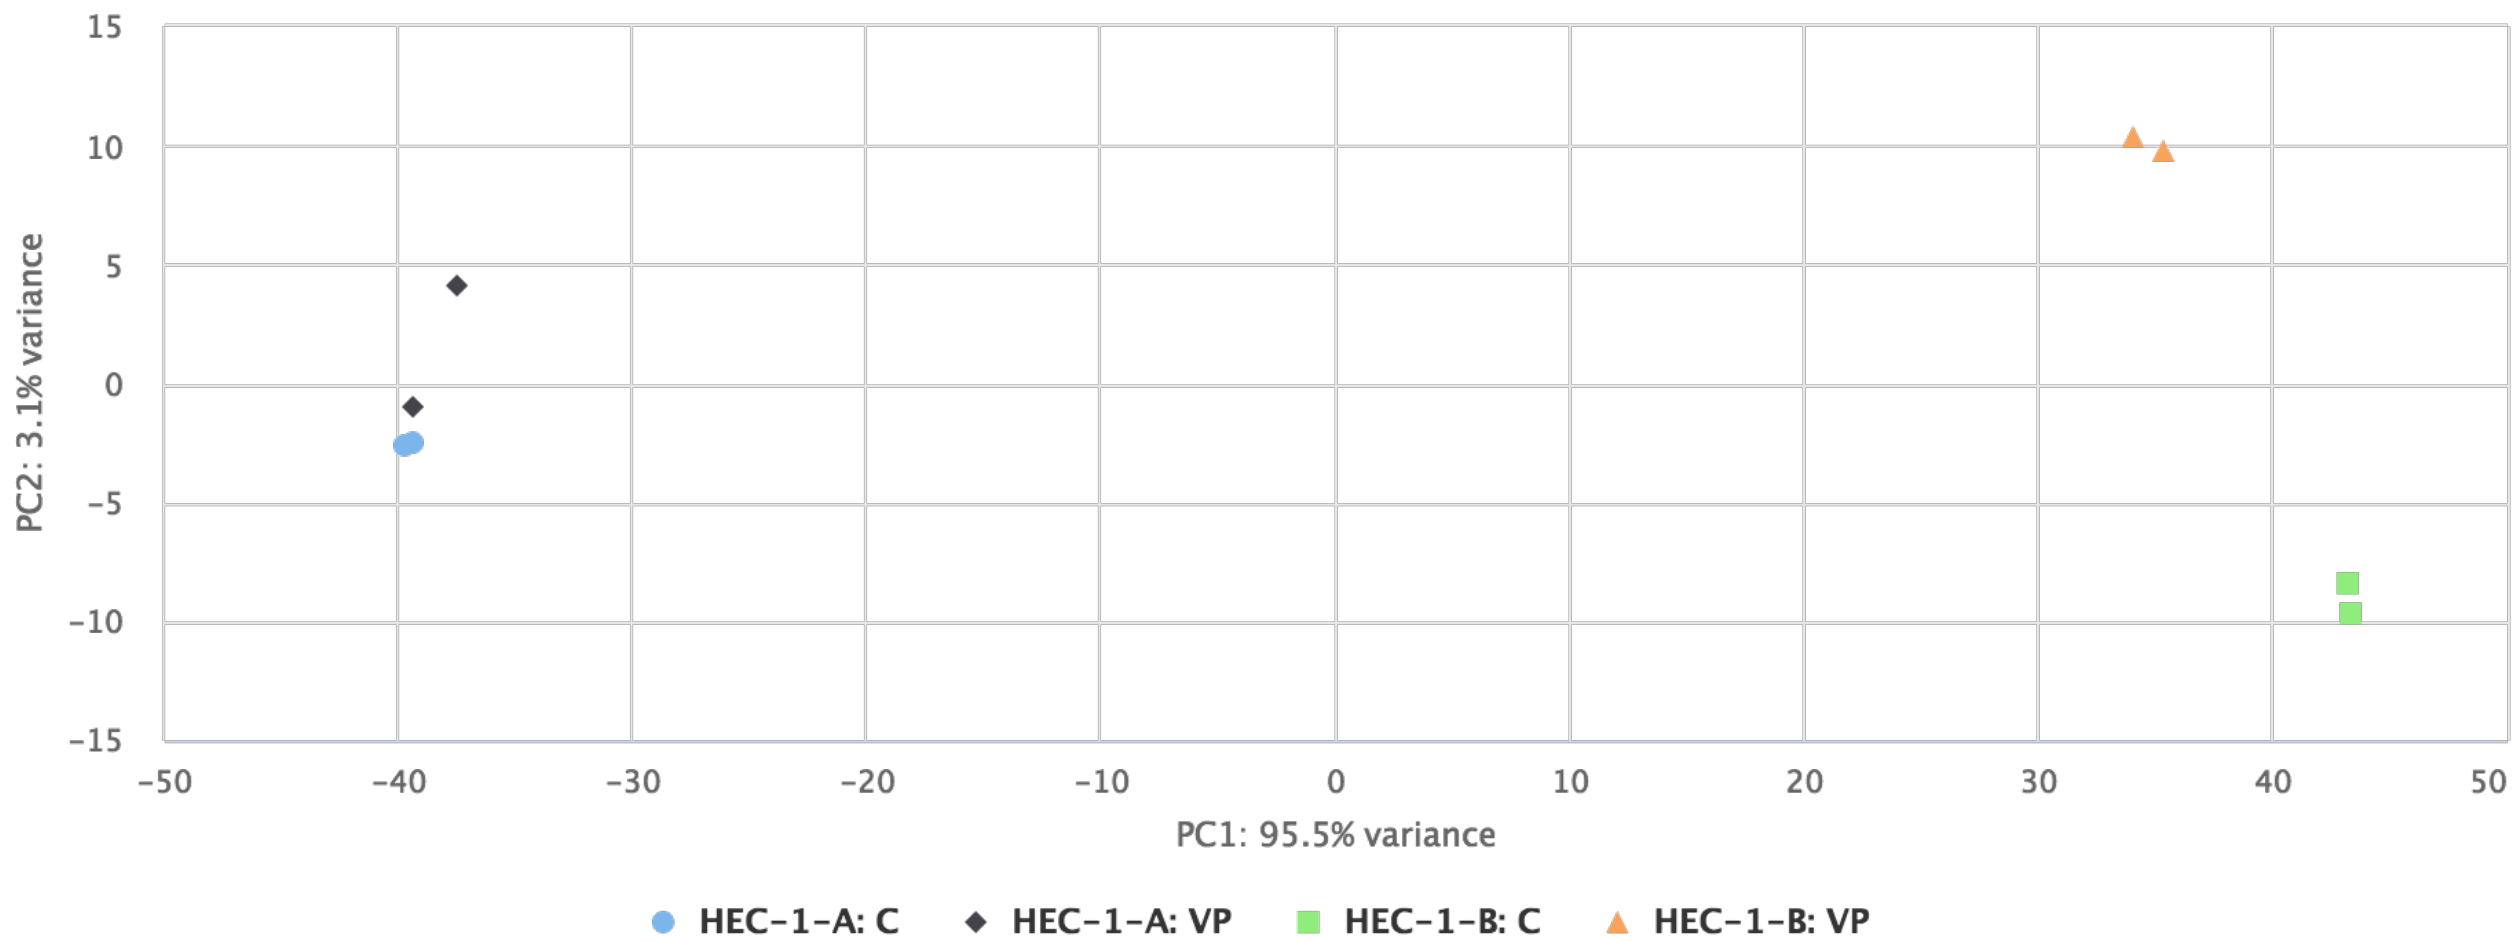

Supplementary Figure S2

A

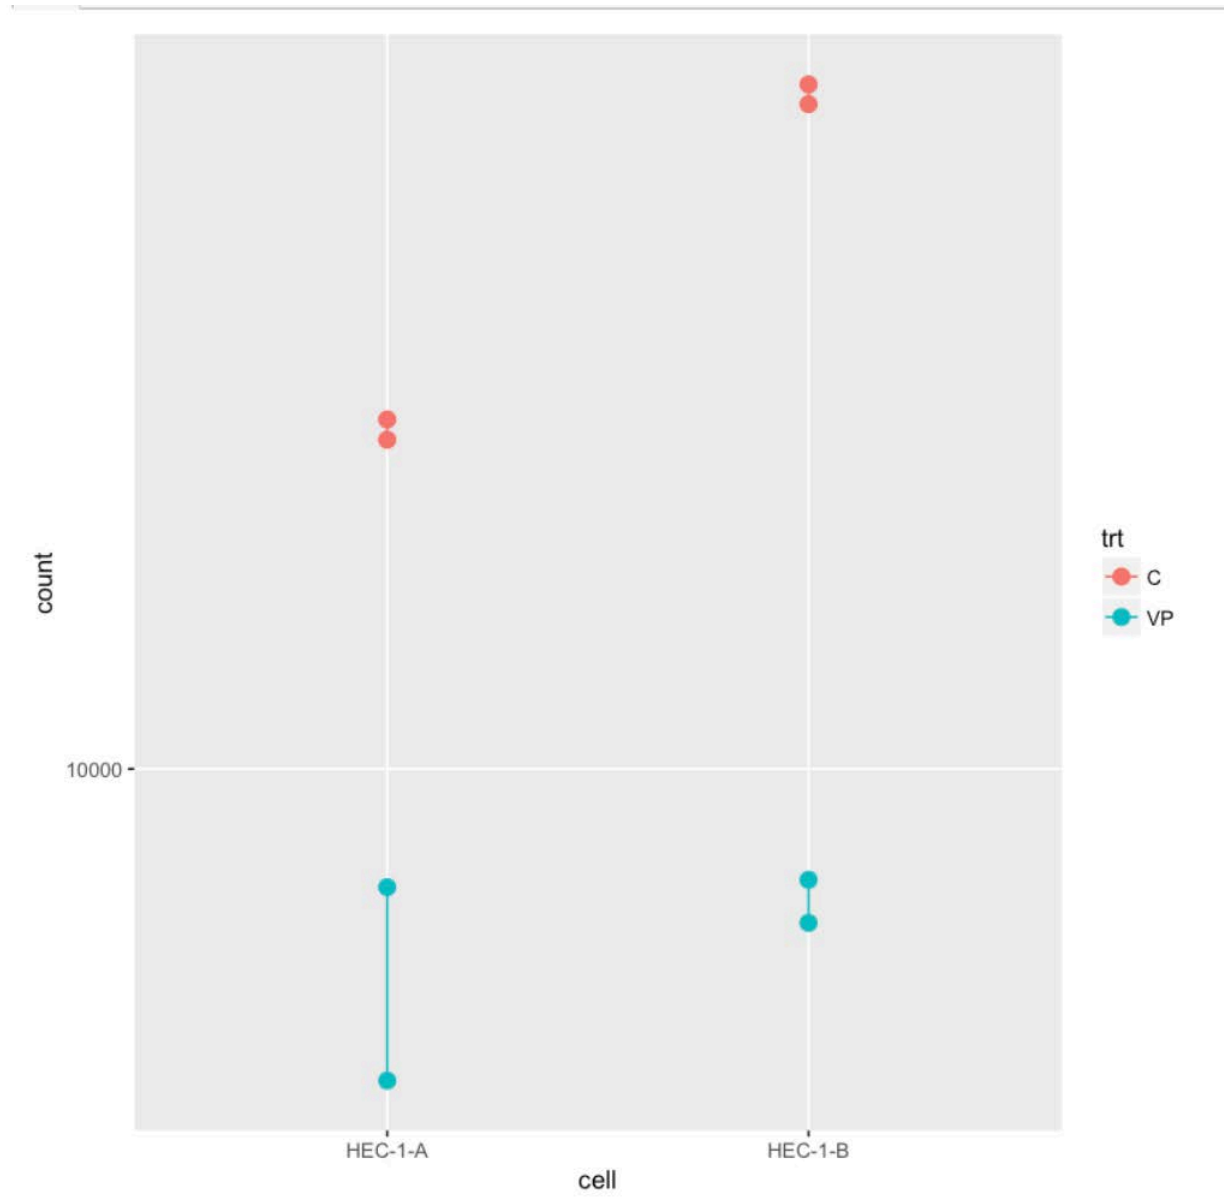

Supplementary Figure S2

**B**

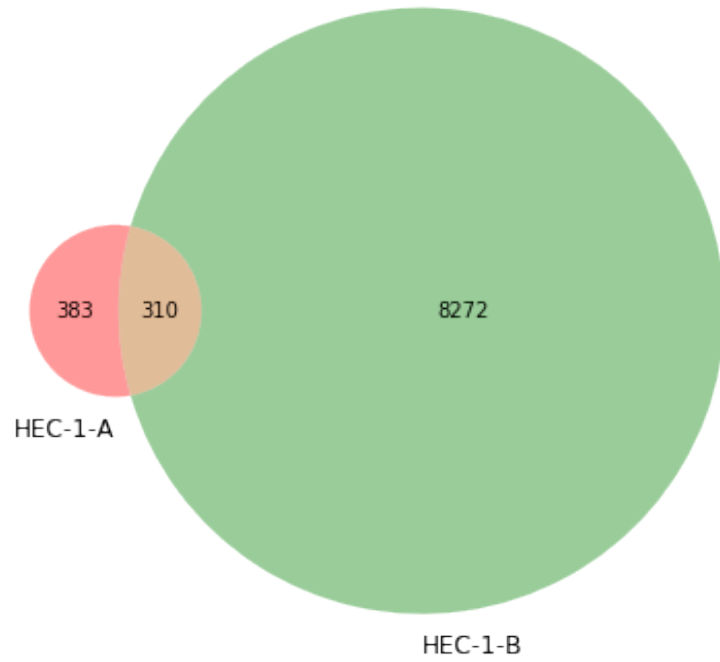

**C**

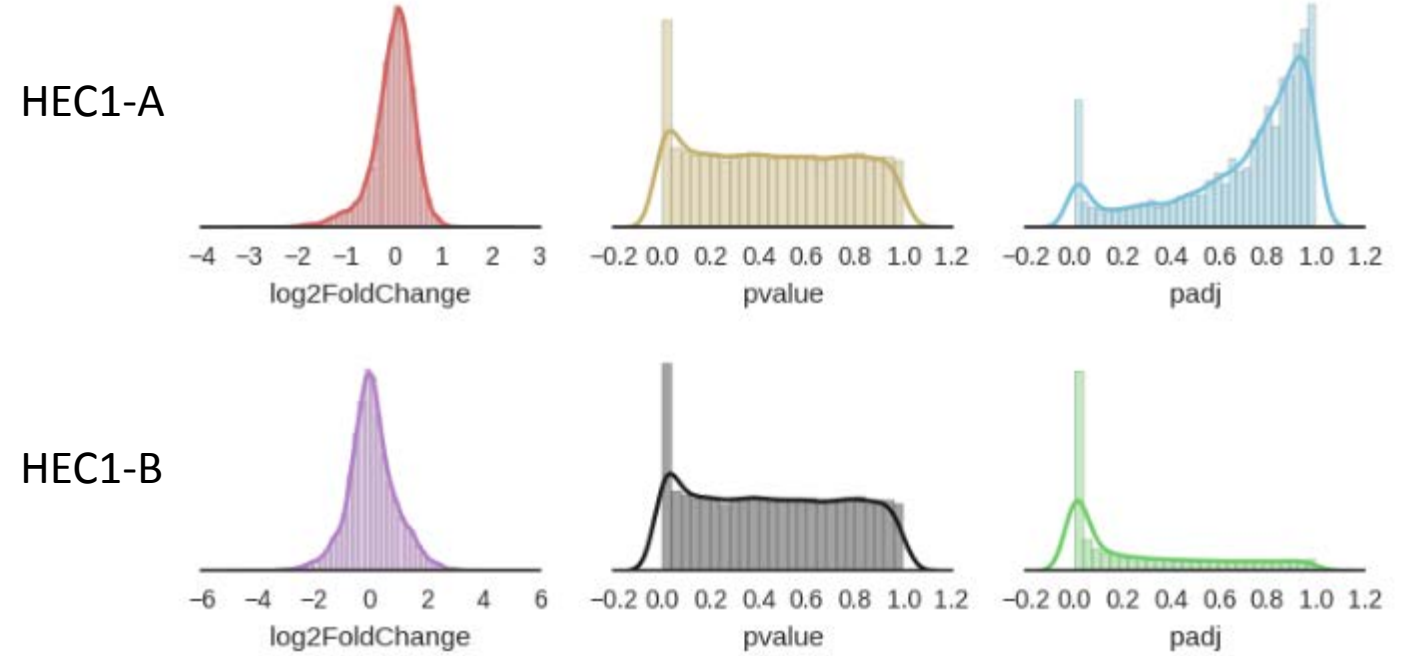

# Supplementary Figure S3

A

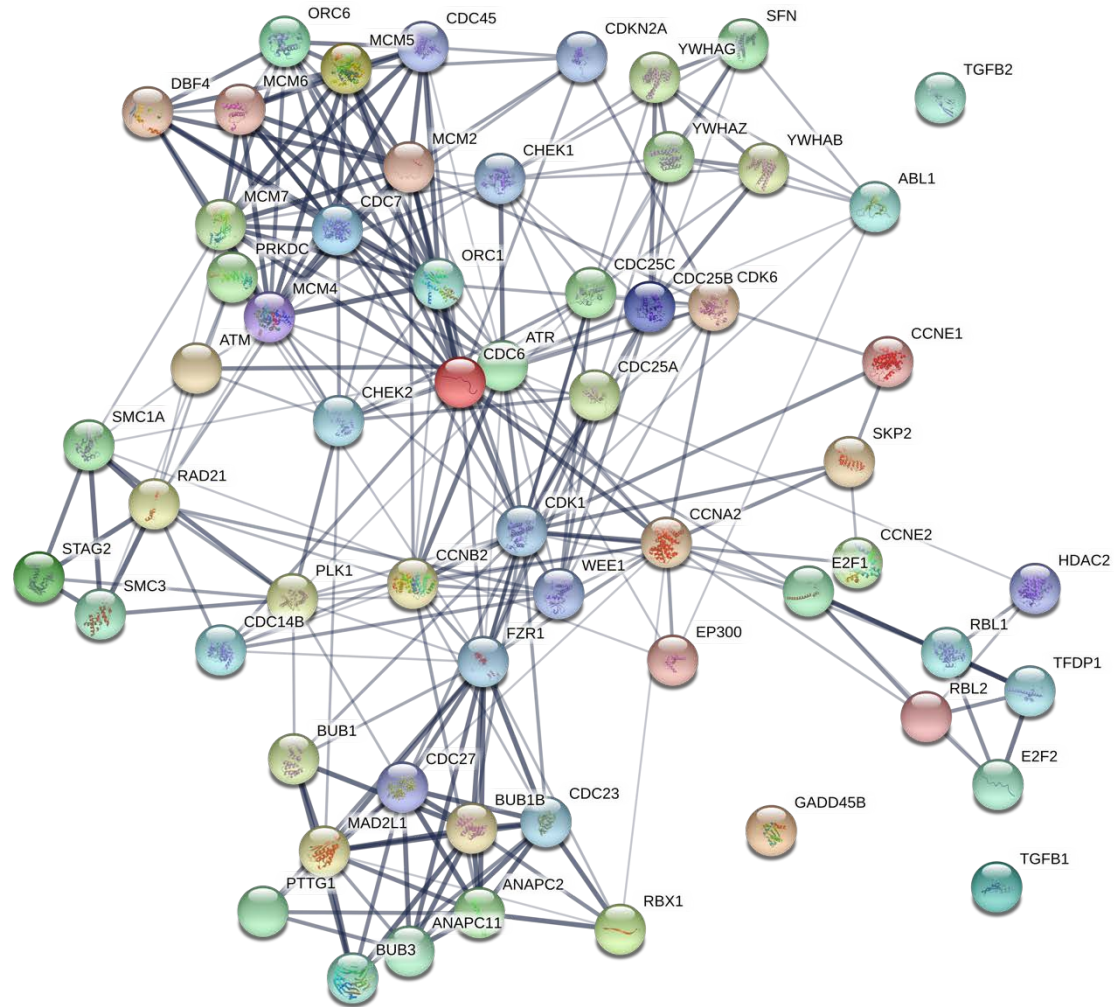

# Supplementary Figure S3

**B**

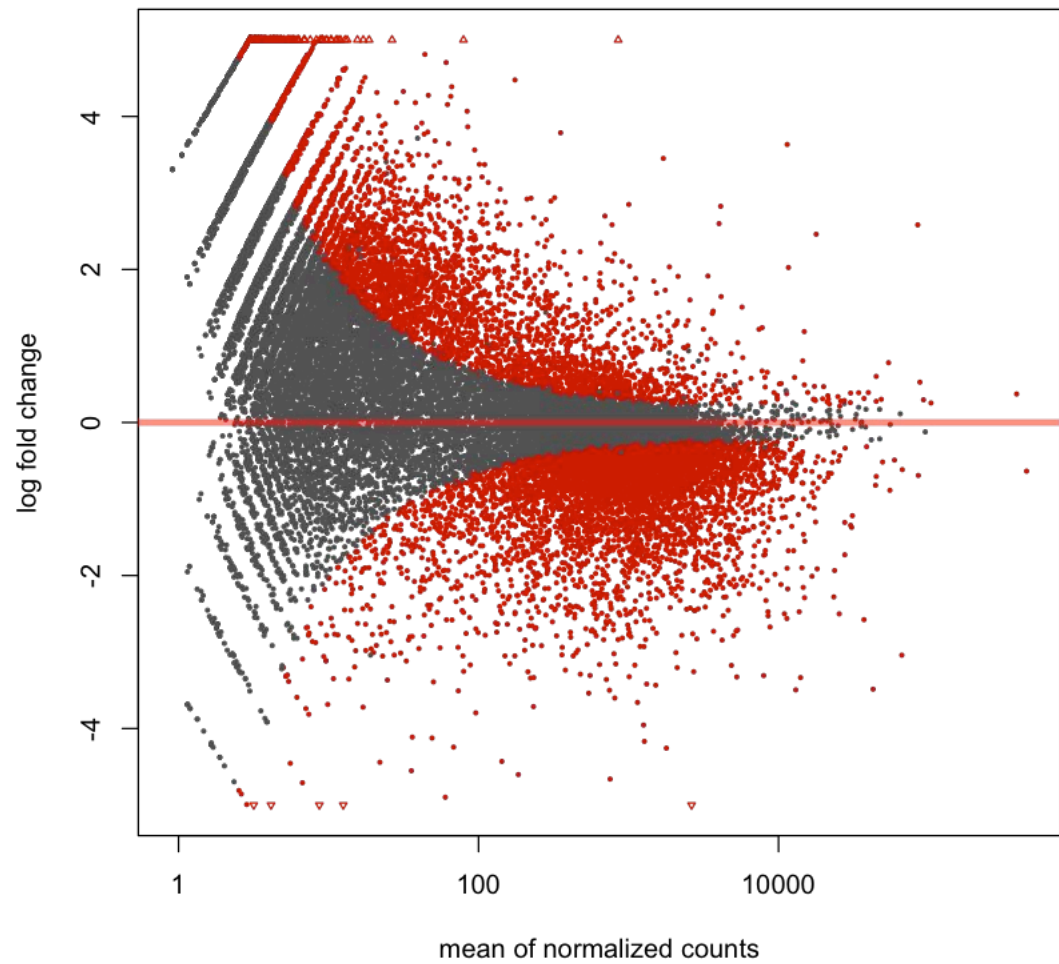

**C**

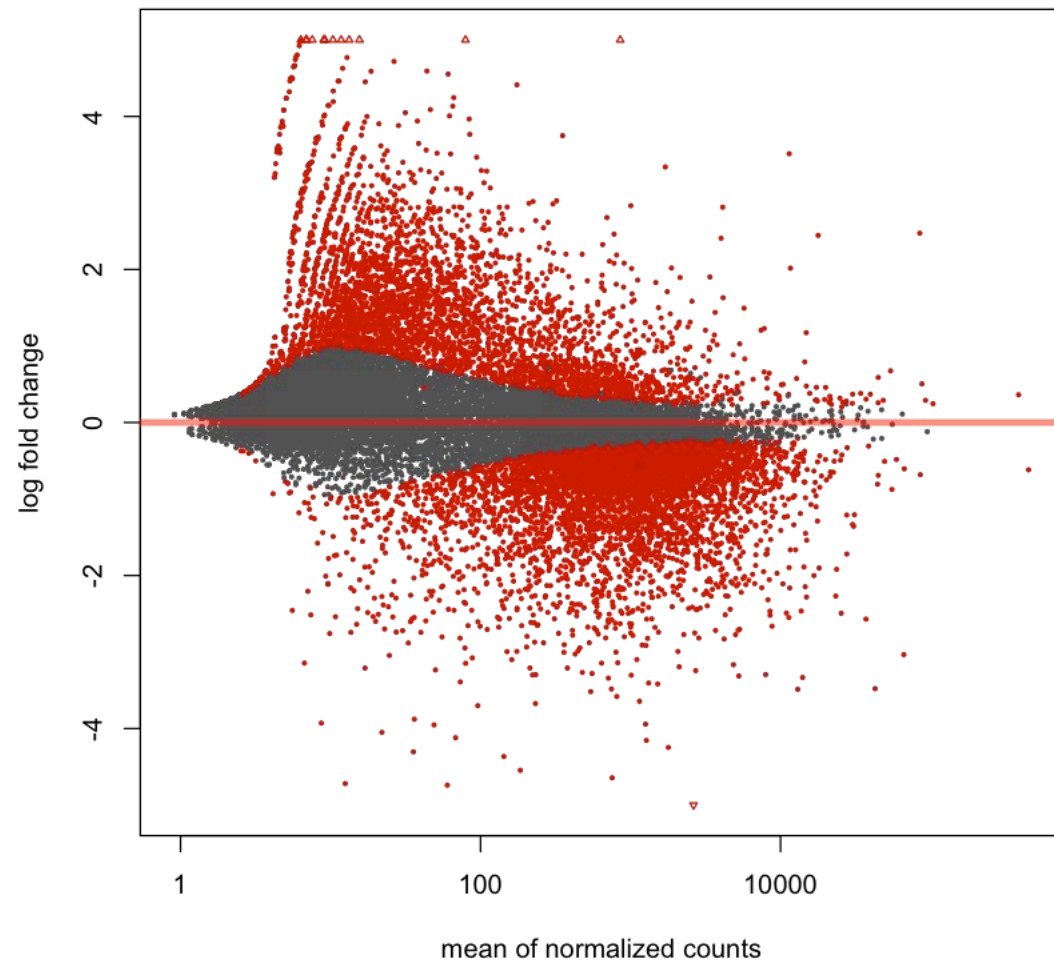

# Supplementary Figure S4

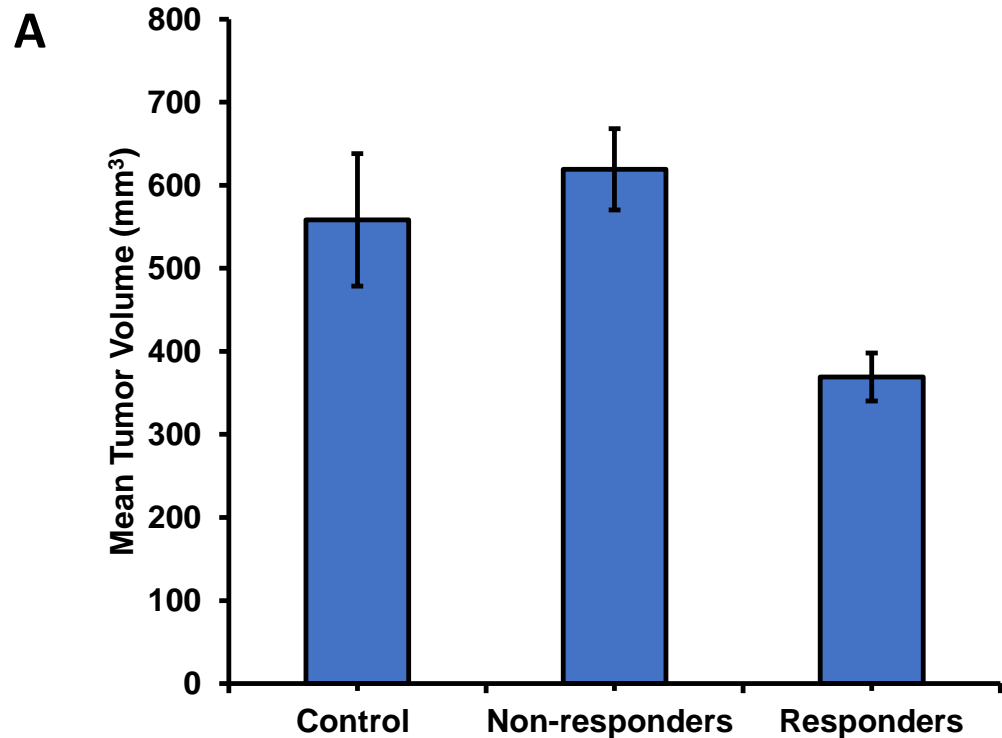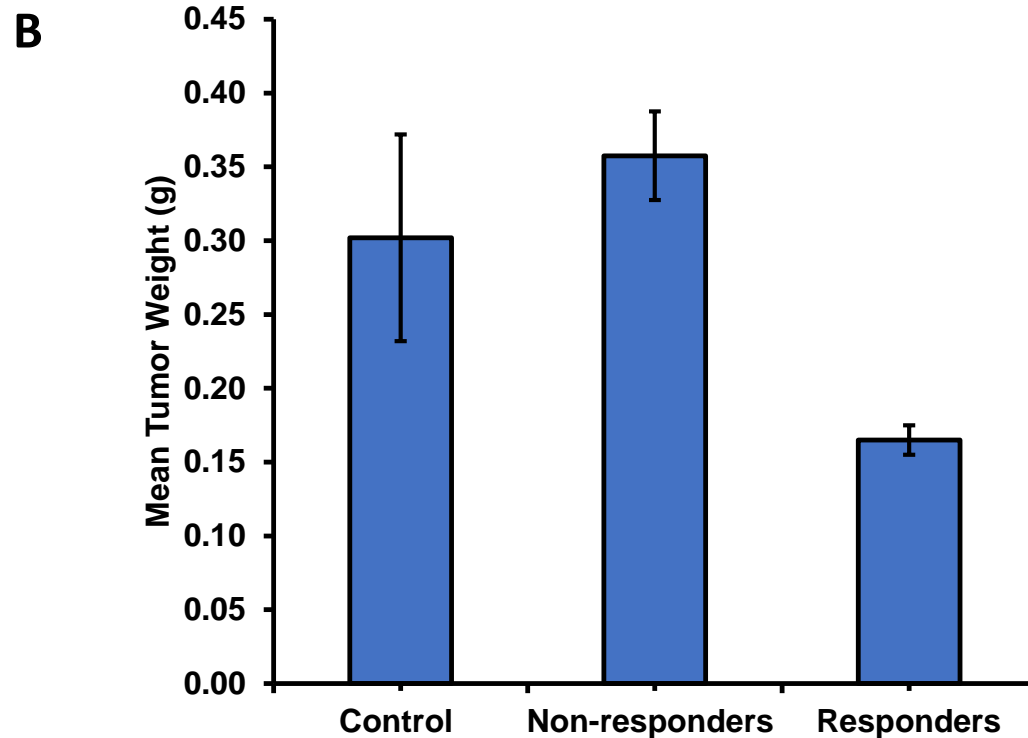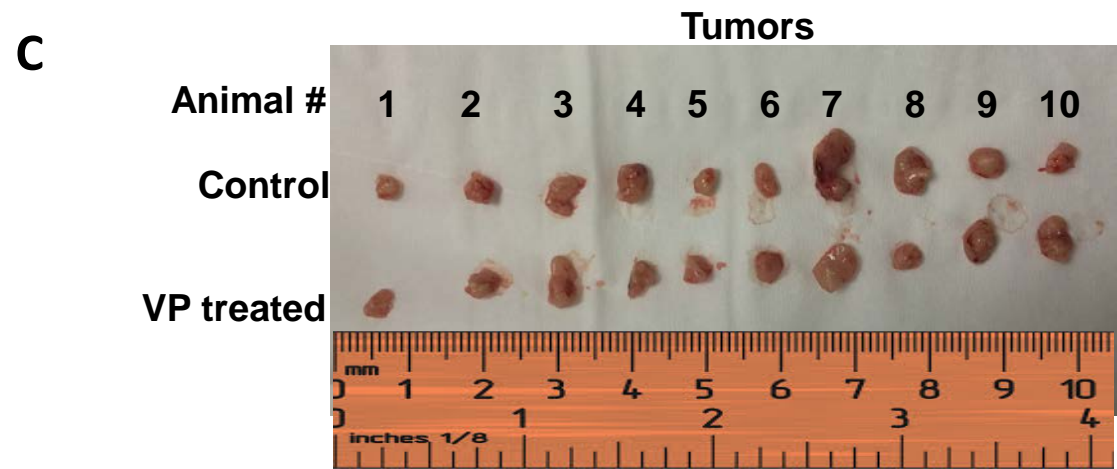

# Supplementary Figure S5

**A**

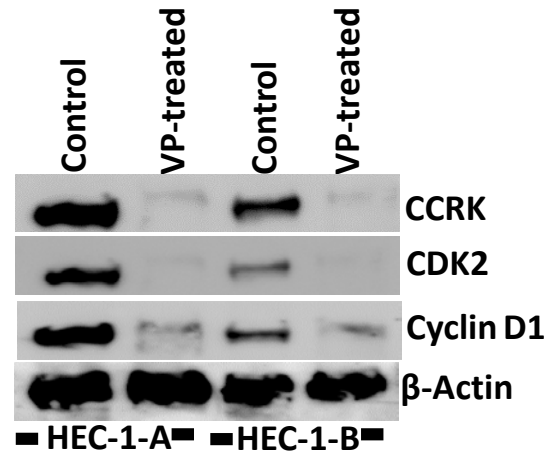

**B**

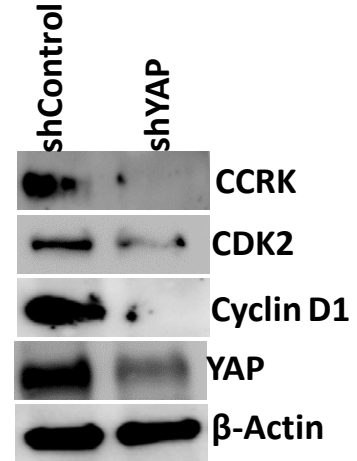

**C**

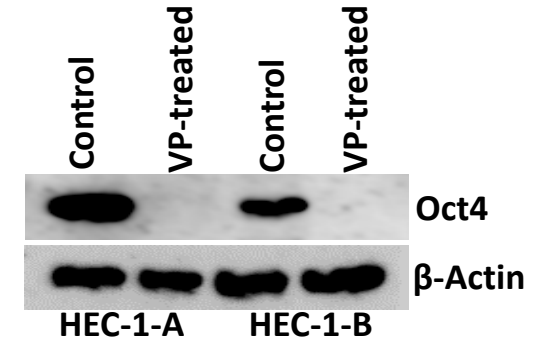

**D**

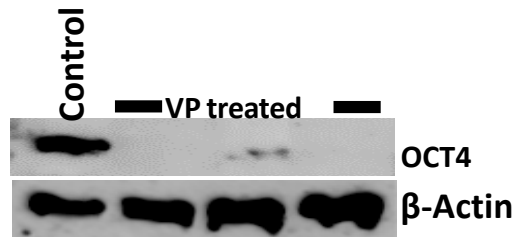



## Supplementary Figure Legends

**Supplementary Figure S1.** PCA plot of HEC-1-A and HEC-1-B: PC1 explains 95.5% of the variance while PC2 explains 3.1% of the variance in a regularized log transform of normalized RNAseq data.

**Supplementary Figure S2.** (A) Count plot of normalized counts with lines connecting cell lines. As DESeq takes into account the cell line effect, the difference being tested is more closely depicted here. (B) Venn diagram showing total number of significantly differentially expressed genes in HEC-1-A and HEC-1-B cell lines. Differentially expressed genes in common with  $\text{padj} > 0.05$  shown here. (C) Quick overview of differentially expressed genes, fold changes and p-values (control vs. VP-treated).

**Supplementary Figure. S3. (A).** Experimentally-derived protein-protein interaction STRING network for the protein products of top differentially expressed genes for HEC-1B after VP treatment. MA-plots of distribution of the estimated coefficients in the model across all genes for HEC-1B cell line. The logFC after VP treatment was plotted on the y-axis and the average of the counts normalized by size factor plotted on the x-axis. **B.** plot of changes induced by treatment – unshrunk average of the counts normalized by size factor. Each gene is represented with a point; genes with a  $\text{padj}$  of less than 0.1 are in red. **C.** MA-plot using counts with shrink function used on log2FC for the comparison of VP and C samples.

**Supplementary Figure S4.** Bar graphs showing (A) Tumor volume and (B) tumor weight curves in both Responders and Non-responders in VP-treated mice. (C). *Tumors of both control and VP-treated mice.* Error bars indicate Mean  $\pm$  SEM.

**Supplementary Figure S5.** (A). Western blot showing VP-induced inhibition of cell cycle proteins in EMCA cells. (B). Western blot analysis showing the effect of YAP knockdown on cell cycle proteins in HEC-1-B cells. Western blot analysis showing the effect of VP on Oct4 in (C) EMCA cells and (D) mouse subcutaneous tumors.

**Supplementary Table S1.** Top 20 upregulated genes in HEC-1-B cells after VP treatment. Standard error of the logFC and p-value adjusted for false discovery rate are also included:

| Gene          | Description                                                                                                                                | log2FoldChange | lfcSE    | padj      |
|---------------|--------------------------------------------------------------------------------------------------------------------------------------------|----------------|----------|-----------|
| HSPA6         | Heat shock protein family A (Hsp70) member 6                                                                                               | 5.356512       | 0.218491 | 2.08E-129 |
| NECAB2        | N-terminal EF-hand calcium binding protein 2                                                                                               | 4.480058       | 0.458063 | 4.06E-21  |
| C2orf88       | Chromosome 2 open reading frame 88                                                                                                         | 4.15286        | 0.345405 | 1.41E-31  |
| AC063976.7    | *                                                                                                                                          | 3.978924       | 0.468799 | 4.42E-16  |
| FAM124A       | Family with sequence similarity 124 member A                                                                                               | 3.825024       | 0.51893  | 2.58E-12  |
| RP11-379F4.4  | *                                                                                                                                          | 3.766931       | 0.45674  | 3.16E-15  |
| RP11-182N22.9 | *                                                                                                                                          | 3.719122       | 0.439024 | 5.04E-16  |
| MROH2A        | Maestro heat like repeat family member 2A                                                                                                  | 3.654299       | 0.401217 | 2.10E-18  |
| KRT15         | Keratin 15                                                                                                                                 | 3.63973        | 0.260933 | 2.88E-42  |
| CYP4F3        | Cytochrome P450 family 4 subfamily F member 3                                                                                              | 3.565897       | 0.45891  | 1.34E-13  |
| PRSS37        | Protease, serine 37                                                                                                                        | 3.561572       | 0.585642 | 1.20E-08  |
| PDE1B         | Phosphodiesterase 1B                                                                                                                       | 3.54203        | 0.492056 | 8.84E-12  |
| SERPINE3      | Serpin family E member 3                                                                                                                   | 3.49608        | 0.391443 | 1.01E-17  |
| AC114812.9    | *                                                                                                                                          | 3.325213       | 0.548638 | 1.36E-08  |
| ADAM20        | ADAM metallopeptidase domain 20                                                                                                            | 3.319796       | 0.52968  | 3.92E-09  |
| RP11-385D13.1 | *                                                                                                                                          | 3.280768       | 0.661252 | 4.92E-06  |
| CTD-2083E4.5  | *                                                                                                                                          | 3.247972       | 0.380907 | 3.19E-16  |
| KIRREL2       | Kin of IRRE like 2 (Drosophila)                                                                                                            | 3.221068       | 0.644197 | 4.08E-06  |
| NEAT1         | Nuclear paraspeckle assembly transcript 1<br>(non...  ) | 3.210791       | 0.435211 | 2.46E-12  |
| C1QTNF7       | C1q and tumor necrosis factor related protein 7                                                                                            | 3.208637       | 0.432881 | 1.91E-12  |

\*New Gene

**Supplementary Table S2.** Top 20 downregulated genes in HEC-1-B cells after VP treatment.

Standard error of the logFC and p-value adjusted for false discovery rate are also included:

| Gene         | Description                                                                           | log2FoldChange | lfcSE    | padj      |
|--------------|---------------------------------------------------------------------------------------|----------------|----------|-----------|
| CYR61        | Cysteine rich angiogenic inducer 61                                                   | -4.880134      | 0.303638 | 6.35E-56  |
| THBS1        | Thrombospondin 1                                                                      | -4.56434       | 0.192111 | 1.54E-121 |
| ANKRD1       | Ankyrin repeat domain 1                                                               | -4.301334      | 0.329177 | 3.65E-37  |
| COL12A1      | Collagen type XII alpha 1 chain                                                       | -4.210756      | 0.140174 | 1.56E-194 |
| DHRS2        | Dehydrogenase/reductase 2                                                             | -4.114623      | 0.341799 | 1.19E-31  |
| PRSS35       | Protease, serine 35                                                                   | -4.112676      | 0.47337  | 8.20E-17  |
| KIF20A       | Kinesin family member 20A                                                             | -4.107755      | 0.162174 | 4.52E-138 |
| HMMR         | Hyaluronan mediated motility receptor                                                 | -3.900449      | 0.158396 | 1.59E-130 |
| CTD-2510F5.4 | Nan  | -3.73182       | 0.428318 | 6.64E-17  |
| DKK1         | Dickkopf WNT signaling pathway inhibitor 1                                            | -3.605873      | 0.161435 | 1.70E-107 |
| SOX2         | SRY-box 2                                                                             | -3.567507      | 0.532713 | 2.60E-10  |
| CTSV         | Cathepsin V                                                                           | -3.564999      | 0.264575 | 1.78E-39  |
| DLGAP5       | DLG associated protein 5                                                              | -3.532073      | 0.186416 | 1.59E-77  |
| EDN1         | Endothelin 1                                                                          | -3.482653      | 0.476836 | 4.19E-12  |
| COL4A1       | Collagen type IV alpha 1 chain                                                        | -3.471255      | 0.111152 | 4.35E-210 |
| PRR11        | Proline rich 11                                                                       | -3.46882       | 0.18829  | 2.57E-73  |
| VCAN         | Versican                                                                              | -3.463459      | 0.109227 | 2.45E-216 |
| PLCL1        | Phospholipase C like 1                                                                | -3.45863       | 0.378973 | 1.79E-18  |
| DEPDC1       | DEP domain containing 1                                                               | -3.444251      | 0.169346 | 3.39E-89  |
| IGFBP7       | Insulin like growth factor binding protein 7                                          | -3.380419      | 0.168105 | 3.28E-87  |

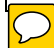

**Supplementary Table S3.** Protein product co-expression table for genes differentially expressed in HEC-1B after VP treatment (experimentally determined links from the literature) from STRING:

| #Gene1  | #Gene2 | Experimentally determined interaction |
|---------|--------|---------------------------------------|
| CDC23   | BUB1B  | 0.997                                 |
| MAD2L1  | BUB1B  | 0.997                                 |
| CDC23   | ANAPC2 | 0.997                                 |
| CDC27   | CDC23  | 0.997                                 |
| CDC27   | ANAPC2 | 0.997                                 |
| MCM2    | MCM6   | 0.992                                 |
| ANAPC2  | BUB1B  | 0.991                                 |
| BUB3    | BUB1B  | 0.989                                 |
| MCM6    | MCM5   | 0.989                                 |
| BUB1    | BUB1B  | 0.989                                 |
| ANAPC11 | ANAPC2 | 0.989                                 |
| MCM2    | MCM4   | 0.989                                 |
| BUB3    | BUB1   | 0.989                                 |
| ORC1    | CDC6   | 0.989                                 |
| CDC27   | BUB1B  | 0.989                                 |
| MCM4    | MCM5   | 0.989                                 |
| MCM7    | MCM2   | 0.989                                 |
| MCM7    | MCM6   | 0.989                                 |
| MCM2    | CDC7   | 0.989                                 |
| MCM7    | MCM5   | 0.989                                 |
| MCM6    | MCM4   | 0.989                                 |
| MCM7    | MCM4   | 0.989                                 |
| MCM2    | MCM5   | 0.989                                 |
| CDC45   | MCM6   | 0.988                                 |
| SMC3    | RAD21  | 0.988                                 |
| ORC1    | MCM6   | 0.988                                 |
| CDC45   | MCM7   | 0.988                                 |
| ORC1    | MCM2   | 0.988                                 |
| FZR1    | CDC23  | 0.988                                 |
| ORC1    | MCM4   | 0.984                                 |
| TFDP1   | E2F1   | 0.983                                 |
| SMC1A   | RAD21  | 0.980                                 |
| ORC1    | MCM5   | 0.980                                 |

|         |         |       |
|---------|---------|-------|
| FZR1    | ANAPC2  | 0.976 |
| BUB1    | MAD2L1  | 0.970 |
| CDC45   | MCM4    | 0.969 |
| MCM4    | CDC7    | 0.969 |
| BUB3    | MAD2L1  | 0.969 |
| CDC45   | MCM2    | 0.968 |
| CDC23   | MAD2L1  | 0.967 |
| SMC3    | SMC1A   | 0.967 |
| ANAPC2  | RBX1    | 0.959 |
| CDC23   | ANAPC11 | 0.959 |
| ORC1    | DBF4    | 0.958 |
| CDK1    | CCNB2   | 0.958 |
| CDC23   | RBX1    | 0.958 |
| MCM2    | CDC6    | 0.957 |
| ANAPC11 | BUB1B   | 0.956 |
| CDC45   | MCM5    | 0.956 |
| CDK1    | CCNA2   | 0.955 |
| RAD21   | STAG2   | 0.954 |
| CDC45   | ORC1    | 0.950 |
| ORC1    | CDC7    | 0.950 |
| DBF4    | MCM5    | 0.949 |
| DBF4    | CDC7    | 0.947 |
| MCM5    | CDC6    | 0.943 |
| CDC7    | MCM5    | 0.942 |
| MCM7    | CDC6    | 0.931 |
| ORC1    | MCM7    | 0.931 |
| CDC27   | ANAPC11 | 0.931 |
| FZR1    | BUB1B   | 0.928 |
| FZR1    | ANAPC11 | 0.926 |
| TFDP1   | RBL1    | 0.924 |
| MCM6    | CDC7    | 0.923 |
| FZR1    | MAD2L1  | 0.922 |
| DBF4    | MCM2    | 0.922 |
| TFDP1   | E2F2    | 0.922 |
| MCM7    | CDC7    | 0.921 |
| CCNA2   | CDC6    | 0.918 |
| CHEK1   | ATR     | 0.914 |
| ATR     | CCNB2   | 0.913 |

|         |        |       |
|---------|--------|-------|
| CDK1    | CDC6   | 0.905 |
| SMC1A   | PLK1   | 0.892 |
| SMC3    | STAG2  | 0.891 |
| ATR     | CDC7   | 0.888 |
| SMC1A   | STAG2  | 0.884 |
| CDC27   | FZR1   | 0.880 |
| ORC6    | MCM5   | 0.876 |
| CDC7    | ORC6   | 0.868 |
| DBF4    | ORC6   | 0.868 |
| CDC45   | ORC6   | 0.868 |
| ATR     | ATM    | 0.864 |
| ANAPC2  | MAD2L1 | 0.859 |
| ORC6    | CDC6   | 0.855 |
| ORC1    | ORC6   | 0.852 |
| DBF4    | MCM4   | 0.848 |
| MCM7    | DBF4   | 0.848 |
| CDC27   | MAD2L1 | 0.835 |
| CDC27   | BUB3   | 0.833 |
| YWHAG   | CDC25B | 0.833 |
| YWHAB   | CDC25B | 0.833 |
| MCM6    | CDC6   | 0.813 |
| SMC3    | PLK1   | 0.807 |
| MCM4    | ORC6   | 0.792 |
| MCM7    | ORC6   | 0.792 |
| BUB1B   | RBX1   | 0.790 |
| CDK1    | ATR    | 0.788 |
| CDK1    | SKP2   | 0.786 |
| WEE1    | CDK1   | 0.782 |
| CDK1    | CDC25C | 0.779 |
| RBL1    | E2F2   | 0.779 |
| RBL1    | E2F1   | 0.779 |
| CDK1    | CDC25A | 0.779 |
| CDK1    | CDC25B | 0.779 |
| FZR1    | CDC25A | 0.779 |
| CDK1    | FZR1   | 0.779 |
| CHEK2   | PLK1   | 0.777 |
| CDC27   | PTTG1  | 0.774 |
| ANAPC11 | PTTG1  | 0.774 |

|       |        |       |
|-------|--------|-------|
| YWHAZ | YWHAG  | 0.774 |
| SFN   | YWHAG  | 0.774 |
| YWHAZ | YWHAB  | 0.774 |
| SKP2  | CCNA2  | 0.774 |
| SFN   | YWHAZ  | 0.774 |
| YWHAG | YWHAB  | 0.774 |
| FZR1  | PTTG1  | 0.774 |
| PTTG1 | ANAPC2 | 0.774 |
| CDC23 | BUB3   | 0.774 |
| TFDP1 | RBL2   | 0.773 |
| CDK1  | CCNE1  | 0.771 |
| E2F1  | RBL2   | 0.757 |

**Supplementary Table S4.** Significantly enriched KEGG pathway protein products (Top 25) from genes differentially expressed in HEC-1-B after VP treatment.

| Pathway ID | Pathway description                     | Observed gene count | False Discovery Rate | Matching proteins in network (labels)                                                                                                                                                                                                                                                                                                                                                                    |
|------------|-----------------------------------------|---------------------|----------------------|----------------------------------------------------------------------------------------------------------------------------------------------------------------------------------------------------------------------------------------------------------------------------------------------------------------------------------------------------------------------------------------------------------|
| 04110      | Cell cycle                              | 59                  | 2.2e-135             | ABL1, ANAPC11, ANAPC2, ATM, ATR, BUB1, BUB1B, BUB3, CCNA2, CCNB2, CCNE1, CCNE2, CDC14B, CDC23, CDC25A, CDC25B, CDC25C, CDC27, CDC45, CDC6, CDC7, CDK6, CDKN2A, CHEK1, CHEK2, DBF4, E2F1, E2F2, EP300, FZR1, GADD45B, HDAC2, MAD2L1, MCM2, MCM4, MCM5, MCM6, MCM7, ORC1, ORC6, PLK1, PRKDC, PTTG1, RAD21, RBL1, RBL2, RBX1, SFN, SKP2, SMC1A, SMC3, STAG2, TFDP1, TGFB1, TGFB2, WEE1, YWHAB, YWHAG, YWHAZ |
| 04114      | Oocyte meiosis                          | 18                  | 1.47e-25             | ANAPC11, ANAPC2, BUB1, CCNB2, CCNE1, CCNE2, CDC23, CDC25C, CDC27, MAD2L1, PLK1, PTTG1, RBX1, SMC1A, SMC3, YWHAB, YWHAG, YWHAZ                                                                                                                                                                                                                                                                            |
| 05166      | HTLV-I infection                        | 19                  | 2.84e-20             | ANAPC11, ANAPC2, ATM, ATR, BUB1B, BUB3, CCNB2, CDC23, CDC27, CDKN2A, CHEK1, CHEK2, E2F1, E2F2, EP300, MAD2L1, PTTG1, TGFB1, TGFB2                                                                                                                                                                                                                                                                        |
| 04914      | Progesterone-mediated oocyte maturation | 13                  | 4.83e-18             | ANAPC11, ANAPC2, BUB1, CCNA2, CCNB2, CDC23, CDC25A, CDC25B, CDC25C, CDC27, FZR1, MAD2L1, PLK1                                                                                                                                                                                                                                                                                                            |
| 04115      | p53 signaling pathway                   | 11                  | 2.85e-15             | ATM, ATR, CCNB2, CCNE1, CCNE2, CDK6, CDKN2A, CHEK1, CHEK2, GADD45B, SFN                                                                                                                                                                                                                                                                                                                                  |
| 05203      | Viral carcinogenesis                    | 14                  | 6.3e-15              | CCNA2, CCNE1, CCNE2, CDK6, CDKN2A, CHEK1, EP300, HDAC2, RBL1, RBL2, SKP2, YWHAB, YWHAG, YWHAZ                                                                                                                                                                                                                                                                                                            |
| 05206      | MicroRNAs in cancer                     | 13                  | 8.73e-15             | ABL1, ATM, CCNE1, CCNE2, CDC25A, CDC25B, CDC25C, CDK6, CDKN2A, E2F1, E2F2, EP300, TGFB2                                                                                                                                                                                                                                                                                                                  |
| 05161      | Hepatitis B                             | 11                  | 8.83e-12             | CCNA2, CCNE1, CCNE2, CDK6, E2F1, E2F2, EP300, TGFB1, TGFB2, YWHAB, YWHAZ                                                                                                                                                                                                                                                                                                                                 |
| 05200      | Pathways in cancer                      | 13                  | 2.24e-10             | ABL1, CCNE1, CCNE2, CDK6, CDKN2A, E2F1, E2F2, EP300, HDAC2, RBX1, SKP2, TGFB1, TGFB2                                                                                                                                                                                                                                                                                                                     |
| 05220      | Chronic myeloid leukemia                | 8                   | 7.04e-10             | ABL1, CDK6, CDKN2A, E2F1, E2F2, HDAC2, TGFB1, TGFB2                                                                                                                                                                                                                                                                                                                                                      |
| 04068      | Fox signaling pathway                   | 9                   | 1.82e-09             | ATM, CCNB2, EP300, GADD45B, PLK1, RBL2, SKP2, TGFB1, TGFB2                                                                                                                                                                                                                                                                                                                                               |
| 05212      | Pancreatic cancer                       | 6                   | 5.77e-07             | CDK6, CDKN2A, E2F1, E2F2, TGFB1, TGFB2                                                                                                                                                                                                                                                                                                                                                                   |
| 03030      | DNA replication                         | 5                   | 1.23e-06             | MCM2, MCM4, MCM5, MCM6, MCM7                                                                                                                                                                                                                                                                                                                                                                             |
| 04350      | TGF-beta signaling pathway              | 6                   | 2.04e-06             | EP300, RBL1, RBX1, TFDP1, TGFB1, TGFB2                                                                                                                                                                                                                                                                                                                                                                   |
| 04120      | Ubiquitin mediated proteolysis          | 7                   | 2.45e-06             | ANAPC11, ANAPC2, CDC23, CDC27, FZR1, RBX1, SKP2                                                                                                                                                                                                                                                                                                                                                          |
| 05222      | Small cell lung cancer                  | 6                   | 3.01e-06             | CCNE1, CCNE2, CDK6, E2F1, E2F2, SKP2                                                                                                                                                                                                                                                                                                                                                                     |
| 05169      | Epstein-Barr virus infection            | 7                   | 2.22e-05             | CCNA2, EP300, HDAC2, SKP2, YWHAB, YWHAG, YWHAZ                                                                                                                                                                                                                                                                                                                                                           |
| 05215      | Prostate cancer                         | 5                   | 8e-05                | CCNE1, CCNE2, E2F1, E2F2, EP300                                                                                                                                                                                                                                                                                                                                                                          |
| 05223      | Non-small cell lung cancer              | 4                   | 0.000286             | CDK6, CDKN2A, E2F1, E2F2                                                                                                                                                                                                                                                                                                                                                                                 |
| 05214      | Glioma                                  | 4                   | 0.000442             | CDK6, CDKN2A, E2F1, E2F2                                                                                                                                                                                                                                                                                                                                                                                 |
| 05211      | Renal cell carcinoma                    | 4                   | 0.000509             | EP300, RBX1, TGFB1, TGFB2                                                                                                                                                                                                                                                                                                                                                                                |
| 05218      | Melanoma                                | 4                   | 0.000654             | CDK6, CDKN2A, E2F1, E2F2                                                                                                                                                                                                                                                                                                                                                                                 |
| 04151      | PI3K-Akt signaling pathway              | 7                   | 0.000692             | CCNE1, CCNE2, CDK6, RBL2, YWHAB, YWHAG, YWHAZ                                                                                                                                                                                                                                                                                                                                                            |
| 04390      | Hippo signaling pathway                 | 5                   | 0.000823             | TGFB1, TGFB2, YWHAB, YWHAG, YWHAZ                                                                                                                                                                                                                                                                                                                                                                        |
| 05219      | Bladder cancer                          | 3                   | 0.00199              | CDKN2A, E2F1, E2F2                                                                                                                                                                                                                                                                                                                                                                                       |



**Supplementary Table S5.** Significantly enriched Pfam protein domains in HEC-1B after VP treatment:

| <b>Pathway ID</b> | <b>Pathway Description</b>         | <b>Observed gene count</b> | <b>False Discovery Rate</b> | <b>Matching proteins in network (labels)</b> |
|-------------------|------------------------------------|----------------------------|-----------------------------|----------------------------------------------|
| PF00244           | 14-3-3 protein                     | 4                          | 6.95e-06                    | SFN, YWHAB, YWHAG, YWHAZ                     |
| PF00493           | MCM2/3/5 family                    | 3                          | 2.39e-05                    | MCM2, MCM5, MCM6                             |
| PF14551           | MCM N-terminal domain              | 3                          | 2.39e-05                    | MCM2, MCM5, MCM6                             |
| PF02463           | RecF/RecN/SMC N terminal domain    | 2                          | 0.0151                      | SMC1A, SMC3                                  |
| PF06470           | SMC proteins Flexible Hinge Domain | 2                          | 0.0151                      | SMC1A, SMC3                                  |

Table S6. Validation of RNASEQ data in HEC-1-B cell line.

| Gene Description | Fold change after VP treatment |          |
|------------------|--------------------------------|----------|
|                  | Fold change                    | p-value  |
| HSPA6            | 1.76                           | 0.027765 |
| C2orf88          | 3.06                           | 0.334911 |
| CYR61            | -79.73                         | 0.087528 |
| THBS1            | -201.94                        | 0.123748 |
| ANKRD1           | -17.99                         | 0.149632 |
| BUB1B            | -1057.12                       | 0.082369 |
| CDC23            | -25.09                         | 0.082425 |
| MAD2L1           | -6.80                          | 0.174852 |
| BUB3             | -12.87                         | 0.095956 |
| CDC27            | -495.56                        | 0.065866 |

Results are based on cDNA qRT-PCR. Each value represents pooled value (3 different treatments were taken from each control and VP treated group and run in duplicate, so that n=6). HEC-1-B cells were treated with 10nM VP for 3h and control cells were treated with DMSO. Fold change calculations were based on values obtained as follows: VP sample /control sample. p values are based on 1-way ANOVA (control vs. VP treatments).

Table S7. Fold change of cell cycle genes in EMCA cell lines after verteporfin treatment.

| Gene Description | HEC-1-A     |          | HEC-1-B     |          |
|------------------|-------------|----------|-------------|----------|
|                  | Fold change | p-value  | Fold change | p-value  |
| CCRK             | -474.22     | 0.091018 | -2581.81    | 0.073007 |
| CDK2             | -3.15       | 0.107108 | -5.88       | 0.058367 |
| CCND1            | -20.73      | 0.093982 | -13.73      | 0.052903 |
| CCNE1            | -8.93       | 0.101753 | -5.12       | 0.085084 |
| E2F1             | -103.17     | 0.077449 | -210.35     | 0.052173 |

Results are based on cDNA qRTPCR. Each value represents pooled value (3 different treatments were taken from each control and VP treated group and run in duplicate, so that n=6). EMCA cells were treated with 10nM VP for 3h and control cells were treated with DMSO. Fold change calculations were based on values obtained as follows: VP sample /control sample. p values are based on 1-way ANOVA (control vs. VP treatments).

Table S8. Fold change of cell cycle genes in mouse subcutaneous tumors after verteporfin treatment.

| Gene Description | Fold change after VP treatment |          |
|------------------|--------------------------------|----------|
|                  | Fold change                    | p-value  |
| CCRK             | -166.26                        | 0.073997 |
| CDK2             | -61.53                         | 0.044884 |
| CCND1            | -7.99                          | 0.772534 |
| CCNE1            | -243.62                        | 0.003639 |
| E2F1             | -29.98                         | 0.016485 |
| BUB1B            | -9.39                          | 0.330252 |
| CDC23            | -100.45                        | 0.012136 |

Results are based on cDNA qRT-PCR. Each value represents pooled value (3 tumor samples were taken from each control and VP treated group and run in duplicate, so that n=6). Fold change calculations were based on values obtained as follows: VP sample /control sample. p values are based on 1-way ANOVA (control vs. VP treatments).

Supplementary Table S9A. Details of the primer sequences used in the study.

### **Human Primers**

All the primer sequences are based on human gene sequences. The primers were designed using PrimerQuest tool and obtained from Integrated DNA Technologies, Inc. (IDT)

| <b>NM No.</b> | <b>Gene</b> | <b>Forward sequence (5'→3')</b> | <b>Reverse sequence (5'→3')</b> |
|---------------|-------------|---------------------------------|---------------------------------|
| NM_001798     | CDK2        | CTTATGAGGCAGGTGAGAGATG          | GACAAGGGTGACAGAGACAAA           |
| NM_178432     | CDK20       | GCTGGGTCAATTCCTTCTCTAC          | GCTCGACTGGATGTTCTCATAC          |
| NM_053056     | CCND1       | CACACACACACACACAAACC            | CCTCCCTTCAACACTTCCTAAA          |
| NM_001238     | CCNE1       | CTGTACTGAGCTGGGCAAATA           | GGTGCAACTTTGGAGGATAGA           |
| NM_005225     | E2F1        | TGCAGAGCAGATGGTTATGG            | CTCCAAGCCCTGTCAGAAAT            |
| NM_004661     | CDC23       | GGTCAACAAACGGGACTACA            | CGGCGTAAGCTCTCCAATAA            |
| NM_001211     | BUB1B       | CAAAGGGAAGCCGAGCTATT            | CACAAGTGTCTTCTGGGTTAGG          |
| NM_002155     | HSPA6       | AAAGCCACTGCTGGAGATAC            | CTCATCAGGGTTGATGCTCTT           |
| NM_019065     | NECAB2      | CTCCGACAGAACCACATCAA            | CCTCTGTCTCCCAGAACTCATA          |
| NM_001042519  | C2orf88     | AGGTACAGAGGGCTGGAATA            | CTGCCTGCTTACAAGACAAATAC         |
| NM_001554     | CYR61       | TCGCATCCTATAACAACCCTTTAC        | CAGTACTTGGGCCGGTATTT            |
| NM_003246     | THBS1       | CTCAGACCGCATTGGAGATAC           | CCATCTGTAGGCGGTGAAAT            |
| NM_014391     | ANKRD1      | GAAGGCTGCTCTGGAGAATAAA          | AGATCCGCGCCATACATAATC           |

|              |        |                         |                          |
|--------------|--------|-------------------------|--------------------------|
| NM_002358    | MAD2L1 | GGA CTCACCTTGCTTG TAACT | CGGACTTCCTCAGAATTGGTAATA |
| NM_013366    | ANAPC2 | CGTCTGTATGGGTGCTTCTT    | CGCCTTGATGGCAGAGATATAG   |
| NM_004725    | BUB3   | CCGAGTGGCAGTTGAGTATTT   | GCAAGCGTAGTCCCATCATT A   |
| NM_001114091 | CDC27  | CTACACCGCAATGCAAATACC   | GCTGCTGGTCCTCCTAATAAA    |
| NM_001101    | ACTB   | GGAAATCGTGCGTGACATTAAG  | TAGTCCGCCTAGAAGCATTTG    |
| NM_002046    | GAPDH  | GATTCCACCCATGGCAAATTC   | GTCATGAGTCCTTCCACGATAC   |
| NM_006347    | PPIH   | CACCTTCCACAGGGTCATAAA   | ACTCAAGAACACCACCAAGAA    |
| NM_000291    | PGK1   | GATTACCTTGCCTGTTGACTTTG | AGTGTCTCCACCACCTATGA     |
| NM_005566    | LDHA   | GCCTGTGCCATCAGTATCTT    | TGCAGTTCGGGCTGTATTT      |

Supplementary Table S9B.

**Mouse primers**

All the primer sequences are based on mouse gene sequences. The primers were designed using PrimerQuest tool and obtained from Integrated DNA Technologies, Inc. (IDT).

| <b>NM No.</b> | <b>Gene</b> | <b>Forward sequence (5'→3')</b> | <b>Reverse sequence (5'→3')</b> |
|---------------|-------------|---------------------------------|---------------------------------|
| XM_006517033  | CDK20       | TCAAAGCCAAGCACGTAGAG            | CCAGGTCCGACAGCATAAAT            |
| NM_183417     | CDK2        | CAAGCGGATTCAGCCAAAG             | GTAGCAGTCAGCACCAGAAA            |
| NM_007631     | CCND1       | GGGAAGTCTTGAGAAGGAGTTT          | GGTCGCACTGACCATCTATAAG          |
| NM_007633     | CCNE1       | GGAGGTGTGCGAAGTCTATAAG          | TCAACTCCAGTGAGGAGAAATG          |
| NM_007891     | E2F1        | CCTGCAGAACAGATGGTCATAG          | CCCAAAGTCACAGTCAAAGAGA          |
| NM_009773     | BUB1B       | GAGCGTCTGAATGAGGACTATG          | CAGGTCAACACTGTAGGAGAAG          |
| NM_178347     | CDC23       | ACCTGTCTGGAGAGAAGAAGA           | CTGGGAGCGTAAGCTGTAATAA          |
| NM_007393     | ACTB        | GAGGTATCCTGACCCTGAAGTA          | GCTCGAAGTCTAGAGCAACATAG         |
| NM_010699     | LDHA        | GGCTTGTGCCATCAGTATCT            | CCCGCCTAAGGTTCTTCATTAT          |
| NM_028677     | PPIH        | CACCTTCCACAGGGTCATAAA           | TCTCGATCTTCCTCATCACTAGA         |

\*Since there is sequence homology between human and mouse genes in GAPDH and PGK1, we used the same primers.

Supplementary Table S10A: Table showing details of primary antibodies used.

| Antigen        | Type              | Dilution | Manufacturer      | Catalogue No. |
|----------------|-------------------|----------|-------------------|---------------|
| CCRK           | Mouse monoclonal  | 1:300    | Santa Cruz        | sc-517320     |
| CDK2           | Mouse monoclonal  | 1:300    | Santa Cruz        | sc-6248       |
| Cyclin D1      | Mouse monoclonal  | 1:300    | Santa Cruz        | sc-20044      |
| $\beta$ -actin | Mouse monoclonal  | 1:1000   | Santa Cruz        | sc-47778      |
| YAP            | Rabbit polyclonal | 1:500    | Novus Biologicals | NB110-58358   |
| OCT4           | Mouse monoclonal  | 1:300    | Bio-Rad           | VMA00234      |

Supplementary Table S10B: Table showing details of secondary antibodies used.

| Type                     | Dilution | Manufacturer       | Catalogue No. |
|--------------------------|----------|--------------------|---------------|
| Goat Anti-Rabbit IgG-HRP | 1:5000   | Boston Bioproducts | B-1215        |
| Goat Anti-Mouse IgG-HRP  | 1:5000   | Boston Bioproducts | B-1115        |
| m-IgGk BP-HRP            | 1:2000   | Santa Cruz         | sc-516102     |



# Figure 4. Supplementary Information – Western Blots.

Verteporfin treated HEC-1-B mouse subcutaneous tumors

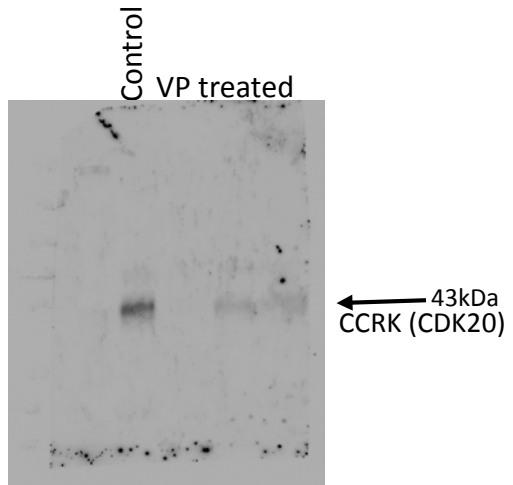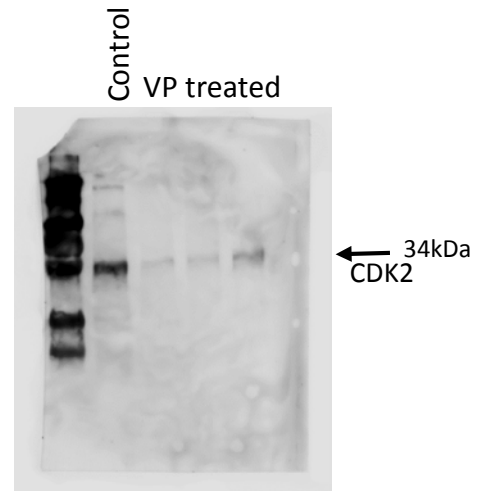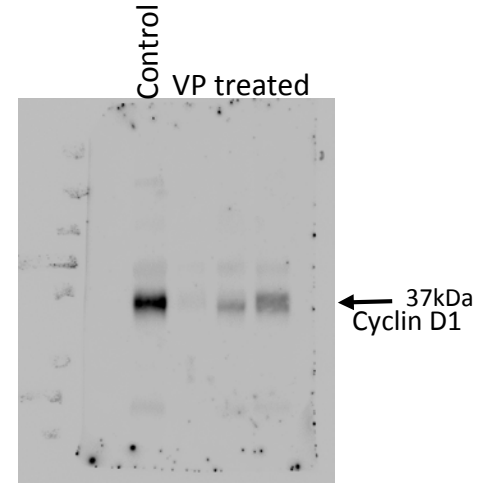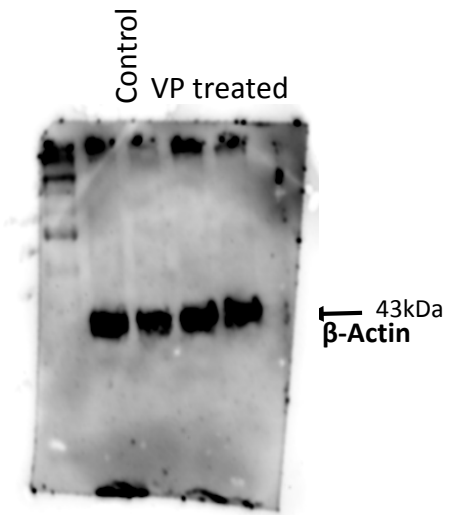

10% gels, each lane 40μg protein.  
Blots are probed with the following:  
All are anti-mouse antibodies.

| Antibody  | Primary | Secondary |
|-----------|---------|-----------|
| CCRK      | 1:300   | 1:1000    |
| CDK2      | 1:300   | 1:1000    |
| Cyclin D1 | 1:300   | 1:1000    |
| β-Actin   | 1:1000  | 1:5000    |

# Supplementary Figure S5. Supplementary Information – Western Blots

**A**

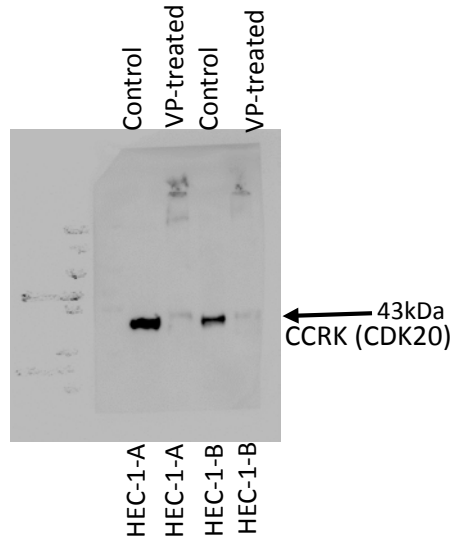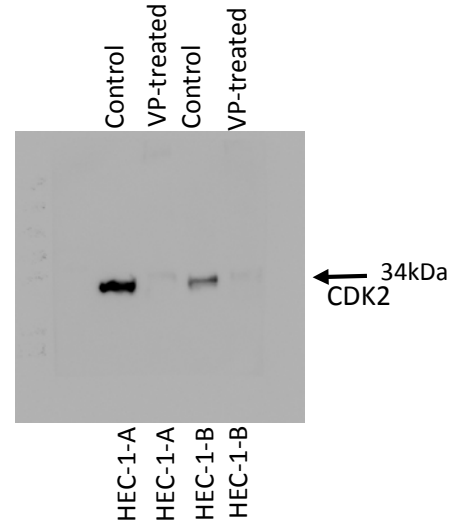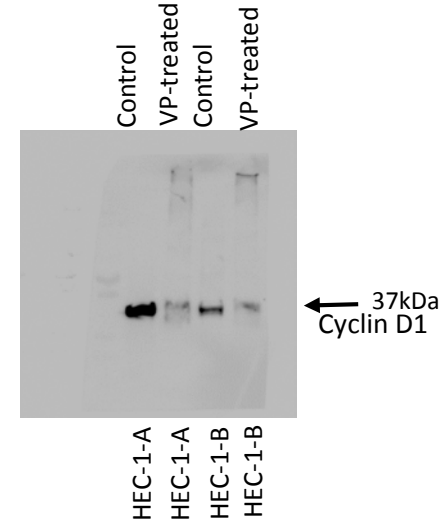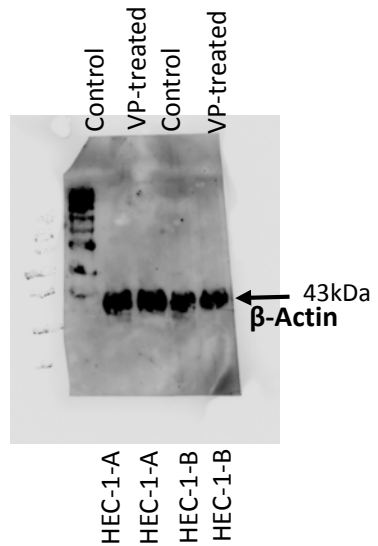

10% gels, each lane 40 $\mu$ g protein.  
Blots are probed with the following:  
All are anti-mouse antibodies.

| Antibody       | Primary | Secondary |
|----------------|---------|-----------|
| CCRK           | 1:300   | 1:1000    |
| CDK2           | 1:300   | 1:1000    |
| Cyclin D1      | 1:300   | 1:1000    |
| $\beta$ -Actin | 1:1000  | 1:5000    |

Figure S5. Supplementary Information – Western Blots.

**B**

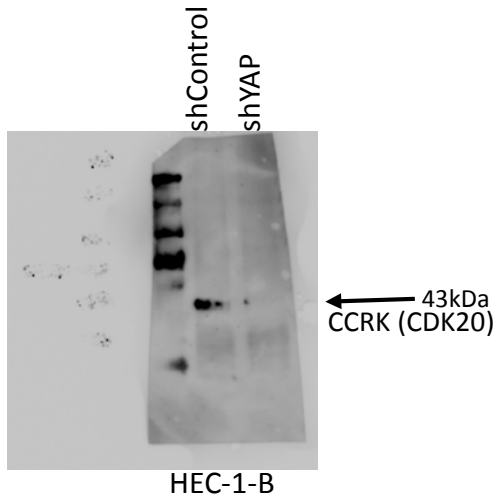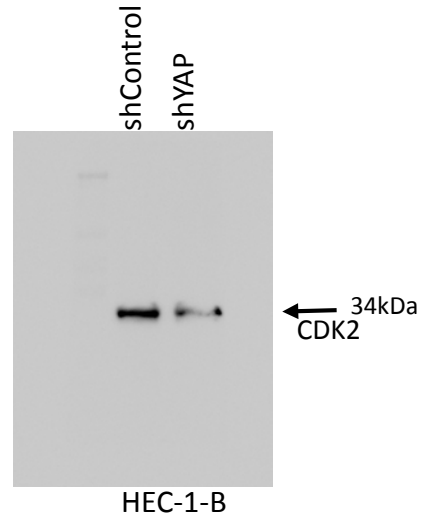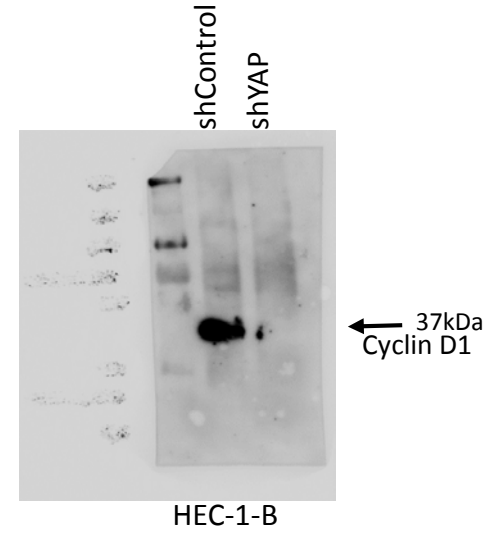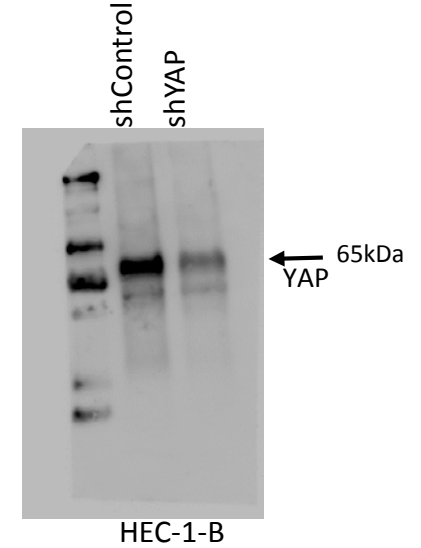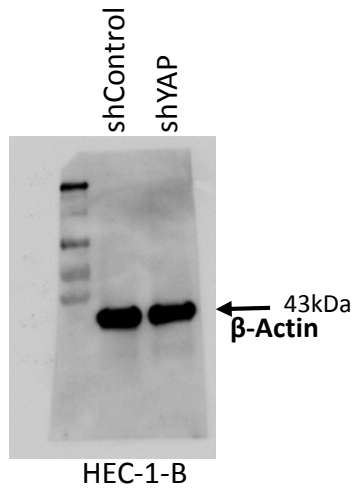

10% gels, each lane 40 $\mu$ g protein.

Blots are probed with the following:

All are anti-mouse antibodies, except YAP (anti-rabbit)

| Antibody       | Primary | Secondary |
|----------------|---------|-----------|
| CCRK           | 1:300   | 1:1000    |
| CDK2           | 1:300   | 1:1000    |
| Cyclin D1      | 1:300   | 1:1000    |
| YAP            | 1:500   | 1:1000    |
| $\beta$ -Actin | 1:1000  | 1:5000    |

**C**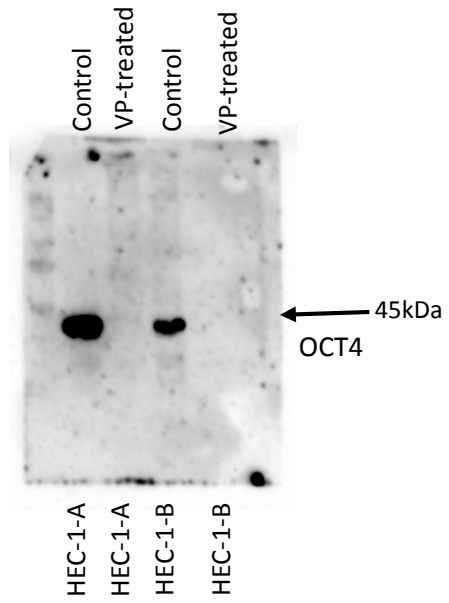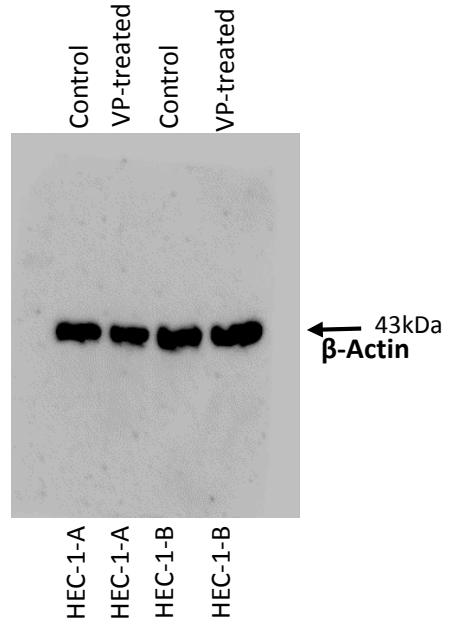**D**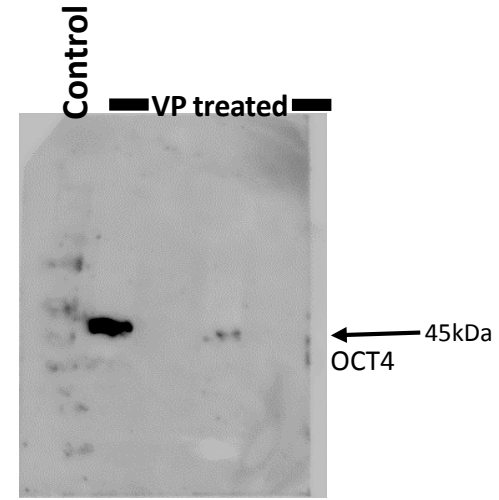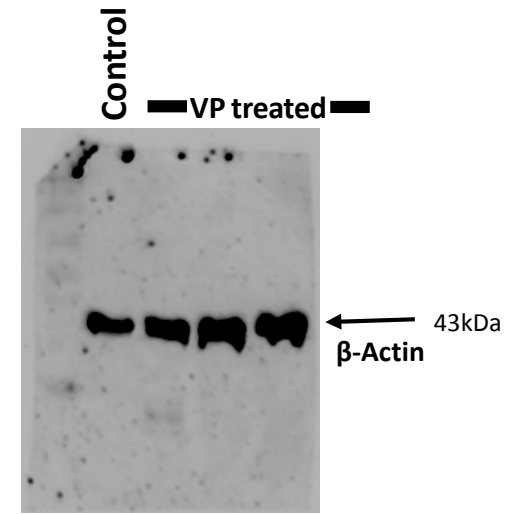

10% gels, each lane 40µg protein.  
 Blots are probed with the following:  
 All are anti-mouse antibodies.

| Antibody | Primary | Secondary |
|----------|---------|-----------|
| OCT4     | 1:300   | 1:1000    |
| β-Actin  | 1:1000  | 1:5000    |
